# Supplementary material
Source: publisher figshare collection journal article supplement (https://gsajournals.figshare.com/articles/dataset/_/9414512)
Supplement: Supplementary file 1 [file 1]

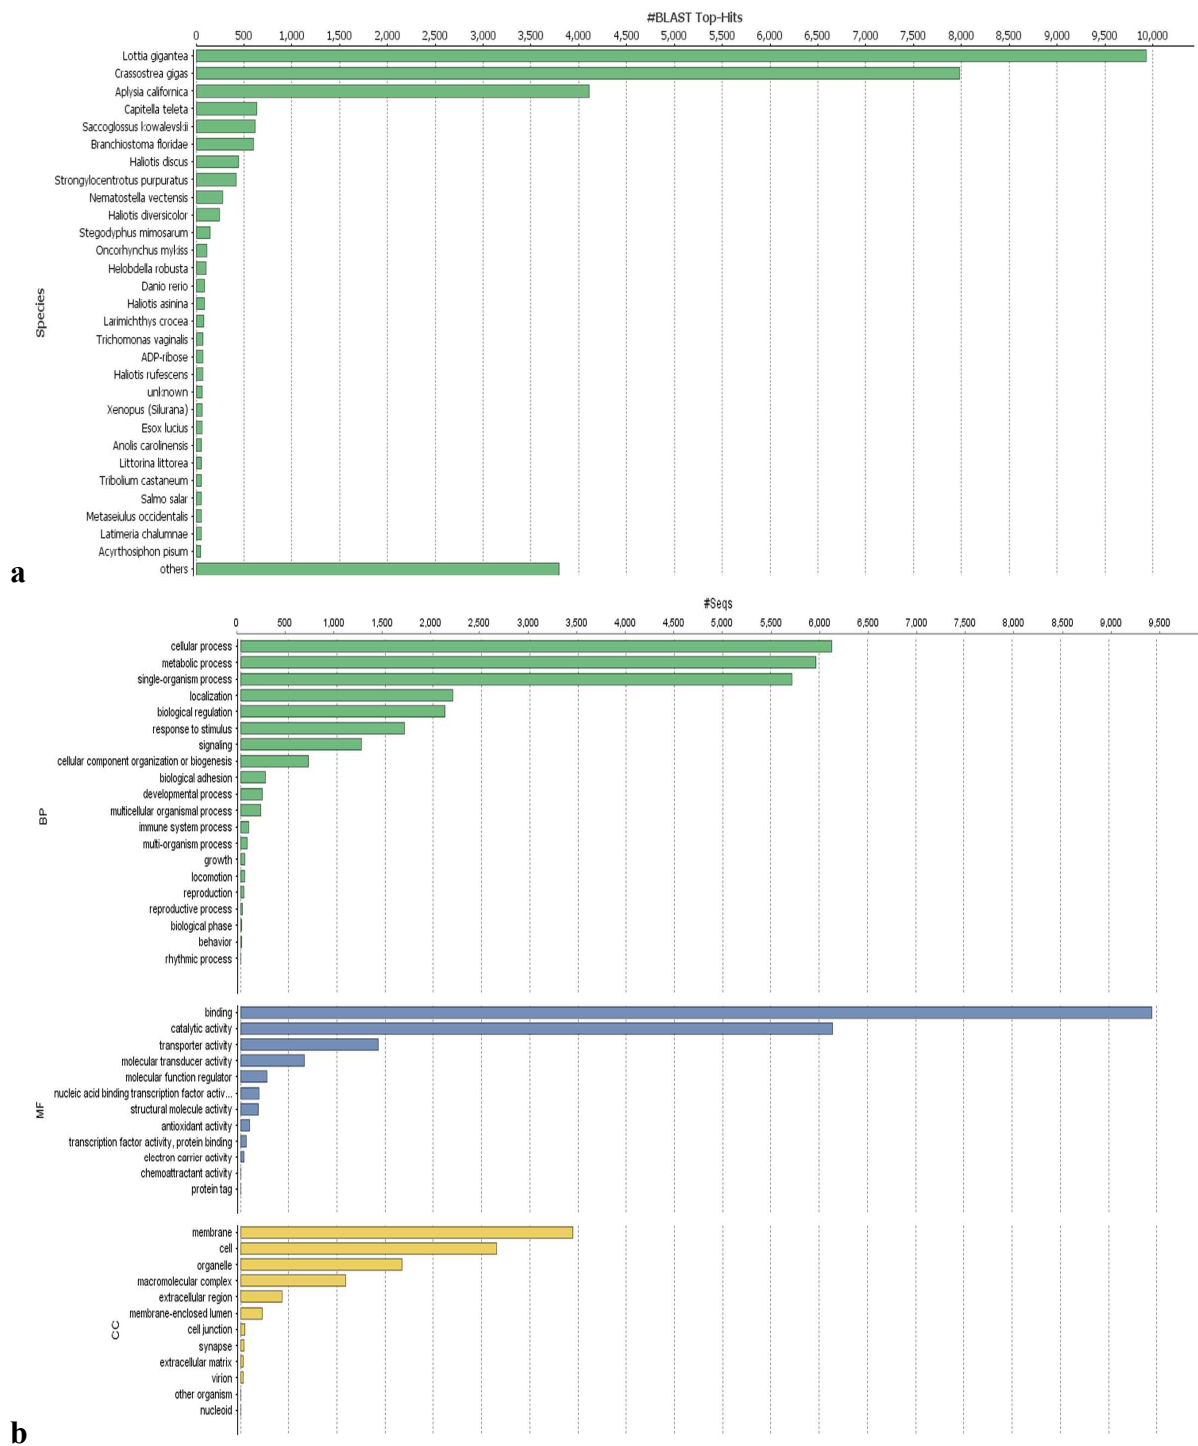

**Figure S1.** Summary of annotation statistics for the *Haliotis laevigata* genome. **(a)** Species distribution. **(b)** Top 10 biological processes (BP), molecular functions (MF) and cellular components (CC) annotated.
